# Supplementary material for: Assessment and phenotypic identification of millet germplasm (Setaria italica L.) in Liaoning, China
Source: PeerJ. 2024 Aug 7;12:e17871. doi: 10.7717/peerj.17871 (PMC11316460; doi:10.7717/peerj.17871)
Supplement: Supplemental Information 3 — Original measurement of 31 agricultural traits. [file peerj-12-17871-s003.xlsx]

## Sheet: All Data
No.	Leaf sheath color LSC	Leaf color of seedling LCS	Seedling leaf attitude SLA	Blooming leaf attitude BLA	Stem number per plant SNP	Tiller habit TH	Branch habit BH	Main Stem Length MSL cm	Peduncle length PL cm	Peduncle shape PS	Main stem diameter MSD mm	Main stem nod number MSN	Main ear length MEL mm	Main ear diameter MED mm	Ear compactness EC	Spike density SD	Ear shape ES	Bristle length BL	Bristle color BC	Protecting glume color PGC	Stigma color STC	Anther color AC	Seed color SC	Shattering habit SH	Kernel color KC	Growing period GP d	Grass weight per plant GWP g	Ear weight per plant EWP g	Seed weight per plant SWP g	1000-seed weight TSW g	Lodging resistance LR
1	1 Green	1 Green	3 Flat	1 Upthrow	2 Moderate	2 Moderate	2 Moderate	135	26	3 Bend	0.4	14	24	2.2	3 Tight	1 Sparse	3 Cylindrical	4 Very long	2 Green	2 Green	2 Yellow	3 Orange	2 Yellow	3 Strong	2 Yellow	120	86.3	21.2	17.2	2.2	3 Strong
2	1 Green	1 Green	3 Flat	1 Upthrow	1 Weak	1 Weak	1 Weak	150	28	3 Bend	0.6	15	23	2.6	3 Tight	1 Sparse	3 Cylindrical	4 Very long	2 Green	2 Green	2 Yellow	3 Orange	2 Yellow	3 Strong	2 Yellow	115	34.6	20.1	15.1	2.9	3 Strong
3	1 Green	1 Green	3 Flat	1 Upthrow	1 Weak	1 Weak	1 Weak	118	25	3 Bend	0.5	13	22	2.3	2 Moderate	3 Semi-tight	2 Fusiform	2 Short	2 Green	2 Green	2 Yellow	3 Orange	2 Yellow	3 Strong	2 Yellow	115	52.3	18.2	14.6	2.8	3 Strong
4	1 Green	2 Yellow	3 Flat	1 Upthrow	1 Weak	1 Weak	1 Weak	143	26	3 Bend	0.5	14	21	2.4	3 Tight	3 Semi-tight	2 Fusiform	2 Short	3 Purple	2 Green	2 Yellow	3 Orange	2 Yellow	2 Moderate	2 Yellow	115	56.2	17.9	14.2	2.4	3 Strong
5	1 Green	1 Green	3 Flat	1 Upthrow	1 Weak	1 Weak	1 Weak	115	23	2 Semi-bend	0.5	13	20	2.4	2 Moderate	1 Sparse	3 Cylindrical	2 Short	2 Green	2 Green	2 Yellow	3 Orange	2 Yellow	2 Moderate	2 Yellow	120	55.3	14.9	10.9	2.5	5 Moderate
6	1 Green	1 Green	3 Flat	1 Upthrow	1 Weak	1 Weak	1 Weak	158	29	3 Bend	0.7	14	23	2.6	2 Moderate	1 Sparse	2 Fusiform	2 Short	2 Green	2 Green	2 Yellow	3 Orange	2 Yellow	2 Moderate	2 Yellow	114	32.4	15.1	11.5	2.5	5 Moderate
7	1 Green	1 Green	2 Semi-upthrow	1 Upthrow	1 Weak	2 Moderate	2 Moderate	146	27	3 Bend	0.5	14	20	2.4	3 Tight	1 Sparse	2 Fusiform	2 Short	3 Purple	2 Green	2 Yellow	3 Orange	2 Yellow	2 Moderate	2 Yellow	115	61.9	16.8	12.1	2.5	3 Strong
8	1 Green	1 Green	2 Semi-upthrow	1 Upthrow	1 Weak	2 Moderate	2 Moderate	148	29	3 Bend	0.6	15	20	2.5	2 Moderate	1 Sparse	2 Fusiform	2 Short	2 Green	2 Green	2 Yellow	3 Orange	2 Yellow	2 Moderate	2 Yellow	109	80.6	16.9	12.1	2.6	3 Strong
9	1 Green	1 Green	2 Semi-upthrow	1 Upthrow	1 Weak	1 Weak	1 Weak	135	25	3 Bend	0.4	13	24	2.4	2 Moderate	1 Sparse	2 Fusiform	2 Short	2 Green	2 Green	2 Yellow	3 Orange	2 Yellow	2 Moderate	2 Yellow	115	72.6	23.6	17.2	2.9	3 Strong
10	1 Green	1 Green	3 Flat	1 Upthrow	1 Weak	1 Weak	1 Weak	100	20	3 Bend	0.4	12	19	2.4	3 Tight	1 Sparse	2 Fusiform	2 Short	2 Green	2 Green	2 Yellow	3 Orange	2 Yellow	2 Moderate	2 Yellow	101	35.7	13.7	10.7	2.9	3 Strong
11	3 Purple	3 Purple	3 Flat	4 hang-down	1 Weak	1 Weak	1 Weak	135	25	3 Bend	0.5	14	23	2.3	2 Moderate	1 Sparse	2 Fusiform	2 Short	2 Green	2 Green	2 Yellow	1 White	2 Yellow	2 Moderate	2 Yellow	110	33.6	18.2	10.9	2.7	5 Moderate
12	3 Purple	1 Green	2 Semi-upthrow	1 Upthrow	1 Weak	1 Weak	1 Weak	135	25	4 Hook-shaped	0.5	14	19	2.2	2 Moderate	1 Sparse	2 Fusiform	2 Short	2 Green	2 Green	2 Yellow	3 Orange	2 Yellow	2 Moderate	2 Yellow	101	19.5	27.6	21.4	2.9	3 Strong
13	1 Green	1 Green	2 Semi-upthrow	1 Upthrow	1 Weak	1 Weak	1 Weak	135	25	3 Bend	0.5	14	20	2.4	2 Moderate	1 Sparse	2 Fusiform	2 Short	2 Green	2 Green	2 Yellow	3 Orange	2 Yellow	2 Moderate	2 Yellow	101	37.2	29.3	15.2	2.9	5 Moderate
14	1 Green	1 Green	2 Semi-upthrow	1 Upthrow	1 Weak	1 Weak	1 Weak	115	23	2 Semi-bend	0.5	13	19	2.4	2 Moderate	1 Sparse	2 Fusiform	2 Short	2 Green	2 Green	2 Yellow	3 Orange	2 Yellow	2 Moderate	2 Yellow	101	83.6	26.8	21.4	2.7	3 Strong
15	1 Green	1 Green	2 Semi-upthrow	1 Upthrow	1 Weak	1 Weak	1 Weak	108	22	3 Bend	0.5	13	17	2.5	2 Moderate	1 Sparse	2 Fusiform	2 Short	2 Green	2 Green	2 Yellow	3 Orange	2 Yellow	2 Moderate	2 Yellow	101	45.8	11.5	9.7	2.7	3 Strong
16	1 Green	1 Green	3 Flat	1 Upthrow	1 Weak	1 Weak	1 Weak	149	26	3 Bend	0.5	14	26	2.6	2 Moderate	1 Sparse	2 Fusiform	3 Long	1 Yellow	2 Green	2 Yellow	3 Orange	2 Yellow	2 Moderate	2 Yellow	130	30.4	18.2	14.5	3.6	3 Strong
17	1 Green	1 Green	3 Flat	1 Upthrow	1 Weak	1 Weak	1 Weak	135	26	3 Bend	0.4	14	23	2.5	2 Moderate	1 Sparse	3 Cylindrical	2 Short	2 Green	2 Green	2 Yellow	3 Orange	2 Yellow	2 Moderate	2 Yellow	123	65.8	14.9	10.8	3.9	3 Strong
18	1 Green	1 Green	1 Upthrow	1 Upthrow	1 Weak	2 Moderate	2 Moderate	90	26	3 Bend	0.4	13	17	2.3	2 Moderate	1 Sparse	3 Cylindrical	2 Short	2 Green	2 Green	2 Yellow	3 Orange	2 Yellow	2 Moderate	2 Yellow	101	19.8	15.3	11.2	3.2	5 Moderate
19	1 Green	1 Green	3 Flat	1 Upthrow	1 Weak	2 Moderate	2 Moderate	148	28	3 Bend	0.4	15	23	2.5	2 Moderate	1 Sparse	4 Clavate	2 Short	2 Green	2 Green	2 Yellow	3 Orange	2 Yellow	2 Moderate	2 Yellow	130	30.8	16.9	12.3	2.9	3 Strong
20	1 Green	1 Green	3 Flat	1 Upthrow	1 Weak	2 Moderate	2 Moderate	151	29	3 Bend	0.5	15	20	2.3	3 Tight	1 Sparse	4 Clavate	3 Long	2 Green	2 Green	2 Yellow	3 Orange	2 Yellow	2 Moderate	2 Yellow	130	51.4	16.1	11.2	2.8	3 Strong
21	3 Purple	1 Green	2 Semi-upthrow	1 Upthrow	1 Weak	2 Moderate	2 Moderate	147	26	3 Bend	0.4	14	20	2.3	2 Moderate	1 Sparse	3 Cylindrical	2 Short	1 Yellow	2 Green	2 Yellow	3 Orange	4 Red	2 Moderate	2 Yellow	123	39.2	15.9	10.3	2.4	5 Moderate
22	1 Green	2 Yellow	3 Flat	2 Semi-upthrow	1 Weak	1 Weak	1 Weak	153	26	2 Semi-bend	0.7	13	20	3.1	2 Moderate	1 Sparse	2 Fusiform	3 Long	2 Green	2 Green	2 Yellow	3 Orange	2 Yellow	2 Moderate	2 Yellow	120	41.5	18.1	13.9	2.6	3 Strong
23	1 Green	2 Yellow	3 Flat	1 Upthrow	1 Weak	2 Moderate	2 Moderate	148	26	3 Bend	0.5	15	20	2.5	2 Moderate	1 Sparse	2 Fusiform	2 Short	3 Purple	2 Green	2 Yellow	3 Orange	2 Yellow	2 Moderate	2 Yellow	120	56.2	16.9	12.4	2.7	3 Strong
24	1 Green	1 Green	3 Flat	1 Upthrow	1 Weak	2 Moderate	2 Moderate	146	25	3 Bend	0.4	15	22	2.4	2 Moderate	1 Sparse	2 Fusiform	2 Short	2 Green	2 Green	2 Yellow	3 Orange	2 Yellow	2 Moderate	2 Yellow	115	55.3	13.9	11.2	3.1	3 Strong
25	3 Purple	1 Green	2 Semi-upthrow	1 Upthrow	1 Weak	2 Moderate	2 Moderate	125	25	3 Bend	0.5	14	19	2.4	2 Moderate	1 Sparse	3 Cylindrical	2 Short	2 Green	2 Green	2 Yellow	3 Orange	2 Yellow	2 Moderate	2 Yellow	123	32.5	18.6	13.1	2.9	3 Strong
26	1 Green	1 Green	2 Semi-upthrow	1 Upthrow	3 Strong	3 Strong	3 Strong	114	18	3 Bend	1	11	37	2.9	3 Tight	3 Semi-tight	2 Fusiform	2 Short	2 Green	2 Green	2 Yellow	3 Orange	2 Yellow	2 Moderate	2 Yellow	124	20.9	20.3	12.3	3	5 Moderate
27	1 Green	1 Green	3 Flat	1 Upthrow	2 Moderate	2 Moderate	2 Moderate	135	26	2 Semi-bend	0.5	14	18	2.4	2 Moderate	1 Sparse	3 Cylindrical	2 Short	2 Green	2 Green	1 While	3 Orange	2 Yellow	2 Moderate	2 Yellow	121	70.6	22.8	17.9	2.7	3 Strong
28	1 Green	1 Green	2 Semi-upthrow	1 Upthrow	1 Weak	2 Moderate	2 Moderate	115	25	3 Bend	0.5	14	18	2.5	2 Moderate	1 Sparse	2 Fusiform	3 Long	2 Green	2 Green	2 Yellow	3 Orange	2 Yellow	2 Moderate	2 Yellow	101	71.6	18.8	13.9	2.2	3 Strong
29	3 Purple	1 Green	3 Flat	1 Upthrow	1 Weak	2 Moderate	2 Moderate	124	25	3 Bend	0.5	14	19	2.5	2 Moderate	1 Sparse	2 Fusiform	2 Short	2 Green	2 Green	2 Yellow	3 Orange	2 Yellow	2 Moderate	2 Yellow	101	35.7	15.9	10.2	2.7	3 Strong
30	1 Green	1 Green	2 Semi-upthrow	2 Semi-upthrow	1 Weak	1 Weak	1 Weak	112	24	3 Bend	0.4	14	17	2.4	2 Moderate	1 Sparse	2 Fusiform	2 Short	2 Green	2 Green	2 Yellow	3 Orange	2 Yellow	2 Moderate	2 Yellow	101	33.9	15.9	12.1	2.6	3 Strong
31	1 Green	1 Green	2 Semi-upthrow	2 Semi-upthrow	2 Moderate	3 Strong	3 Strong	120	25	3 Bend	0.8	14	18	2.4	2 Moderate	1 Sparse	2 Fusiform	2 Short	2 Green	2 Green	2 Yellow	3 Orange	5 Cyan	2 Moderate	4 livid	101	19.5	16.1	12.8	2.6	3 Strong
32	1 Green	1 Green	3 Flat	1 Upthrow	1 Weak	1 Weak	1 Weak	150	26	3 Bend	0.7	14	24	2.5	2 Moderate	1 Sparse	3 Cylindrical	2 Short	2 Green	2 Green	2 Yellow	3 Orange	2 Yellow	2 Moderate	2 Yellow	120	38.2	15.9	11.3	2.6	3 Strong
33	1 Green	1 Green	3 Flat	1 Upthrow	1 Weak	1 Weak	1 Weak	121	25	3 Bend	0.5	12	23	2.4	2 Moderate	1 Sparse	3 Cylindrical	2 Short	2 Green	2 Green	2 Yellow	3 Orange	2 Yellow	2 Moderate	2 Yellow	120	83.6	13.9	11.1	2.5	3 Strong
34	1 Green	1 Green	3 Flat	1 Upthrow	1 Weak	1 Weak	1 Weak	145	24	3 Bend	0.6	14	20	2.4	2 Moderate	1 Sparse	2 Fusiform	2 Short	2 Green	2 Green	2 Yellow	3 Orange	2 Yellow	2 Moderate	2 Yellow	123	53.6	18.9	13.9	2.8	3 Strong
35	1 Green	1 Green	3 Flat	1 Upthrow	1 Weak	1 Weak	1 Weak	155	26	3 Bend	0.7	15	24	2.6	2 Moderate	1 Sparse	2 Fusiform	2 Short	2 Green	2 Green	2 Yellow	3 Orange	2 Yellow	2 Moderate	2 Yellow	120	35.4	16.9	11.1	2.6	5 Moderate
36	3 Purple	1 Green	2 Semi-upthrow	1 Upthrow	1 Weak	1 Weak	1 Weak	115	31	3 Bend	0.5	14	23	3.3	2 Moderate	1 Sparse	2 Fusiform	2 Short	2 Green	2 Green	1 While	1 White	2 Yellow	3 Strong	2 Yellow	117	34.6	23.8	18.2	3	3 Strong
37	1 Green	1 Green	3 Flat	1 Upthrow	1 Weak	1 Weak	1 Weak	107	21	3 Bend	0.6	14	21	2.5	2 Moderate	1 Sparse	4 Clavate	2 Short	2 Green	2 Green	2 Yellow	3 Orange	2 Yellow	3 Strong	2 Yellow	101	52.1	11.7	9.3	2.9	3 Strong
38	3 Purple	1 Green	2 Semi-upthrow	2 Semi-upthrow	1 Weak	2 Moderate	1 Weak	130	26	3 Bend	0.4	13	21	1.9	2 Moderate	1 Sparse	3 Cylindrical	3 Long	2 Green	2 Green	2 Yellow	3 Orange	2 Yellow	3 Strong	2 Yellow	120	59.2	18.1	10.1	3	3 Strong
39	1 Green	1 Green	1 Upthrow	4 hang-down	2 Moderate	2 Moderate	2 Moderate	135	22	2 Semi-bend	0.6	14	25	2.9	2 Moderate	1 Sparse	3 Cylindrical	2 Short	2 Green	2 Green	3	3 Orange	2 Yellow	2 Moderate	2 Yellow	120	75.3	29.6	23.4	3	5 Moderate
40	1 Green	2 Yellow	3 Flat	2 Semi-upthrow	3 Strong	3 Strong	3 Strong	120	26	4 Hook-shaped	0.7	16	25	2.5	2 Moderate	1 Sparse	3 Cylindrical	2 Short	2 Green	2 Green	2 Yellow	3 Orange	2 Yellow	3 Strong	2 Yellow	121	32.8	29.1	15.1	2.5	5 Moderate
41	1 Green	1 Green	2 Semi-upthrow	2 Semi-upthrow	3 Strong	3 Strong	3 Strong	136	40	4 Hook-shaped	0.6	13	28	2.4	2 Moderate	1 Sparse	3 Cylindrical	3 Long	2 Green	2 Green	1 While	3 Orange	2 Yellow	3 Strong	2 Yellow	123	85.9	26.2	21.2	2.5	5 Moderate
42	3 Purple	1 Green	2 Semi-upthrow	1 Upthrow	2 Moderate	2 Moderate	2 Moderate	150	30	3 Bend	0.5	13	24	2.4	2 Moderate	1 Sparse	2 Fusiform	3 Long	1 Yellow	2 Green	2 Yellow	3 Orange	2 Yellow	3 Strong	2 Yellow	118	81.6	23.8	18.3	3	5 Moderate
43	3 Purple	1 Green	2 Semi-upthrow	1 Upthrow	3 Strong	3 Strong	3 Strong	134	32	3 Bend	0.4	12	20	2.5	2 Moderate	1 Sparse	3 Cylindrical	1 Very short	2 Green	2 Green	2 Yellow	3 Orange	2 Yellow	3 Strong	2 Yellow	122	75.6	18.1	14.2	3	5 Moderate
44	1 Green	1 Green	2 Semi-upthrow	1 Upthrow	1 Weak	1 Weak	1 Weak	145	24	3 Bend	0.6	11	28	3.2	2 Moderate	1 Sparse	2 Fusiform	2 Short	2 Green	2 Green	2 Yellow	3 Orange	2 Yellow	3 Strong	2 Yellow	119	34.7	41.1	27.3	2.5	3 Strong
45	1 Green	1 Green	2 Semi-upthrow	1 Upthrow	2 Moderate	2 Moderate	2 Moderate	127	18	2 Semi-bend	0.5	15	23	2.8	2 Moderate	1 Sparse	2 Fusiform	2 Short	2 Green	2 Green	2 Yellow	3 Orange	2 Yellow	3 Strong	2 Yellow	122	33.4	23.2	18.1	2	3 Strong
46	3 Purple	2 Yellow	2 Semi-upthrow	2 Semi-upthrow	1 Weak	1 Weak	1 Weak	110	27	3 Bend	0.4	11	25	2.5	2 Moderate	1 Sparse	2 Fusiform	1 Very short	2 Green	2 Green	3 Purple	3 Orange	2 Yellow	3 Strong	2 Yellow	113	9.2	18.6	21.4	2	5 Moderate
47	1 Green	1 Green	2 Semi-upthrow	1 Upthrow	2 Moderate	2 Moderate	2 Moderate	156	26	3 Bend	0.5	14	40	2.2	2 Moderate	1 Sparse	2 Fusiform	3 Long	3 Purple	2 Green	1 While	3 Orange	2 Yellow	3 Strong	2 Yellow	119	71.3	25.6	16.3	2.5	3 Strong
48	1 Green	1 Green	2 Semi-upthrow	1 Upthrow	1 Weak	1 Weak	1 Weak	136	23	3 Bend	0.4	13	25	2.4	2 Moderate	1 Sparse	3 Cylindrical	2 Short	2 Green	2 Green	2 Yellow	2 Yellow	2 Yellow	3 Strong	2 Yellow	125	74.6	22.1	15.2	2.5	5 Moderate
49	1 Green	1 Green	2 Semi-upthrow	1 Upthrow	1 Weak	1 Weak	1 Weak	130	24	4 Hook-shaped	0.4	15	22	2.3	2 Moderate	1 Sparse	2 Fusiform	3 Long	1 Yellow	2 Green	2 Yellow	3 Orange	2 Yellow	3 Strong	2 Yellow	121	119.8	14.3	9.5	3	3 Strong
50	1 Green	1 Green	2 Semi-upthrow	1 Upthrow	3 Strong	1 Weak	3 Strong	132	24	3 Bend	0.4	13	25	2.4	3 Tight	1 Sparse	3 Cylindrical	2 Short	2 Green	2 Green	1 While	1 White	2 Yellow	2 Moderate	2 Yellow	122	37.2	25.9	21.1	2.5	3 Strong
51	1 Green	1 Green	2 Semi-upthrow	1 Upthrow	2 Moderate	2 Moderate	2 Moderate	130	20	2 Semi-bend	0.4	15	19	1.9	2 Moderate	1 Sparse	3 Cylindrical	2 Short	2 Green	2 Green	1 While	3 Orange	2 Yellow	2 Moderate	2 Yellow	122	83.8	21.2	15.2	2.5	3 Strong
52	1 Green	1 Green	2 Semi-upthrow	1 Upthrow	2 Moderate	2 Moderate	2 Moderate	123	27	3 Bend	0.4	13	26	2.8	2 Moderate	1 Sparse	3 Cylindrical	2 Short	2 Green	2 Green	2 Yellow	3 Orange	2 Yellow	3 Strong	2 Yellow	118	93.1	23.8	18.1	3	5 Moderate
53	3 Purple	1 Green	2 Semi-upthrow	1 Upthrow	3 Strong	3 Strong	3 Strong	160	31	2 Semi-bend	0.4	10	25	3.2	2 Moderate	1 Sparse	3 Cylindrical	2 Short	2 Green	2 Green	1 While	1 White	2 Yellow	3 Strong	2 Yellow	121	30.4	22.8	11.5	2.5	5 Moderate
54	1 Green	1 Green	3 Flat	1 Upthrow	2 Moderate	2 Moderate	2 Moderate	130	27	3 Bend	0.4	12	24	1.9	2 Moderate	1 Sparse	3 Cylindrical	3 Long	2 Green	2 Green	2 Yellow	3 Orange	2 Yellow	2 Moderate	2 Yellow	122	85.8	18.2	13.1	2.5	5 Moderate
55	1 Green	1 Green	1 Upthrow	1 Upthrow	2 Moderate	2 Moderate	2 Moderate	110	23	2 Semi-bend	0.5	13	21	3.2	2 Moderate	1 Sparse	3 Cylindrical	2 Short	2 Green	2 Green	2 Yellow	3 Orange	2 Yellow	2 Moderate	2 Yellow	123	19.4	31.8	21.8	3	5 Moderate
56	1 Green	1 Green	2 Semi-upthrow	1 Upthrow	2 Moderate	2 Moderate	2 Moderate	112	25	4 Hook-shaped	0.4	14	24	2.6	2 Moderate	1 Sparse	3 Cylindrical	2 Short	3 Purple	2 Green	2 Yellow	2 Yellow	2 Yellow	3 Strong	2 Yellow	123	40.8	22.3	16.2	3	5 Moderate
57	1 Green	1 Green	3 Flat	4 hang-down	2 Moderate	2 Moderate	2 Moderate	132	22	3 Bend	0.4	12	22	1.9	2 Moderate	1 Sparse	3 Cylindrical	2 Short	2 Green	2 Green	2 Yellow	3 Orange	2 Yellow	3 Strong	2 Yellow	122	55.4	25.1	18.1	2	5 Moderate
58	3 Purple	1 Green	2 Semi-upthrow	1 Upthrow	3 Strong	3 Strong	3 Strong	154	23	3 Bend	0.5	13	24	0.7	2 Moderate	1 Sparse	3 Cylindrical	2 Short	2 Green	2 Green	2 Yellow	2 Yellow	2 Yellow	3 Strong	2 Yellow	123	39.2	25.9	9.5	2.5	5 Moderate
59	1 Green	2 Yellow	3 Flat	4 hang-down	2 Moderate	2 Moderate	2 Moderate	155	25	3 Bend	0.5	13	21	2.2	2 Moderate	1 Sparse	3 Cylindrical	3 Long	2 Green	2 Green	2 Yellow	3 Orange	2 Yellow	3 Strong	2 Yellow	122	44.5	20.2	15.3	3	5 Moderate
60	1 Green	1 Green	2 Semi-upthrow	1 Upthrow	2 Moderate	2 Moderate	2 Moderate	112	24	3 Bend	0.5	13	18	2.1	2 Moderate	1 Sparse	2 Fusiform	2 Short	2 Green	2 Green	2 Yellow	3 Orange	2 Yellow	2 Moderate	2 Yellow	101	52.1	11.6	9.6	2.9	5 Moderate
61	3 Purple	1 Green	2 Semi-upthrow	4 hang-down	2 Moderate	2 Moderate	2 Moderate	153	26	4 Hook-shaped	0.5	11	26	2.7	2 Moderate	1 Sparse	2 Fusiform	2 Short	2 Green	2 Green	2 Yellow	3 Orange	2 Yellow	3 Strong	2 Yellow	120	45.5	25.9	16.2	2.5	5 Moderate
62	3 Purple	1 Green	2 Semi-upthrow	4 hang-down	1 Weak	1 Weak	1 Weak	164	32	4 Hook-shaped	0.6	11	32	2.7	2 Moderate	1 Sparse	2 Fusiform	3 Long	2 Green	2 Green	1 While	2 Yellow	2 Yellow	3 Strong	2 Yellow	120	37.9	33.6	23.8	3	5 Moderate
63	1 Green	1 Green	2 Semi-upthrow	1 Upthrow	2 Moderate	2 Moderate	2 Moderate	90	19	3 Bend	0.5	14	25	2.5	2 Moderate	1 Sparse	3 Cylindrical	2 Short	2 Green	2 Green	1 While	3 Orange	2 Yellow	3 Strong	2 Yellow	119	38.3	20.1	11.2	3	5 Moderate
64	1 Green	1 Green	3 Flat	3 Flat	3 Strong	3 Strong	3 Strong	147	28	4 Hook-shaped	0.5	14	22	2.8	2 Moderate	1 Sparse	2 Fusiform	2 Short	2 Green	2 Green	1 While	1 White	2 Yellow	3 Strong	2 Yellow	123	22.6	28.7	18.9	3	5 Moderate
65	1 Green	1 Green	1 Upthrow	4 hang-down	2 Moderate	2 Moderate	2 Moderate	130	24	2 Semi-bend	0.4	11	23	2	2 Moderate	1 Sparse	2 Fusiform	2 Short	2 Green	2 Green	2 Yellow	3 Orange	2 Yellow	3 Strong	2 Yellow	123	46.9	19.1	12.1	2.5	5 Moderate
66	1 Green	1 Green	3 Flat	4 hang-down	3 Strong	3 Strong	3 Strong	170	30	3 Bend	0.4	12	21	2.6	2 Moderate	1 Sparse	2 Fusiform	2 Short	2 Green	2 Green	3 Purple	3 Orange	2 Yellow	3 Strong	2 Yellow	123	23.3	27.8	18.1	2	5 Moderate
67	1 Green	1 Green	3 Flat	4 hang-down	3 Strong	3 Strong	3 Strong	106	22	2 Semi-bend	0.5	13	20	2.9	2 Moderate	1 Sparse	4 Clavate	2 Short	2 Green	2 Green	2 Yellow	3 Orange	2 Yellow	3 Strong	2 Yellow	120	45.1	25.1	18.8	3.5	3 Strong
68	3 Purple	1 Green	2 Semi-upthrow	1 Upthrow	2 Moderate	1 Weak	2 Moderate	153	25	3 Bend	0.5	12	24	3.5	2 Moderate	1 Sparse	3 Cylindrical	2 Short	2 Green	2 Green	2 Yellow	3 Orange	2 Yellow	3 Strong	2 Yellow	123	51.9	31.7	17.3	3	3 Strong
69	3 Purple	1 Green	2 Semi-upthrow	3 Flat	2 Moderate	1 Weak	2 Moderate	133	23	3 Bend	0.5	11	23	3.5	2 Moderate	3 Semi-tight	2 Fusiform	2 Short	2 Green	2 Green	2 Yellow	3 Orange	2 Yellow	3 Strong	2 Yellow	123	43.9	24.8	18.2	3.5	3 Strong
70	1 Green	1 Green	2 Semi-upthrow	1 Upthrow	3 Strong	3 Strong	3 Strong	133	28	4 Hook-shaped	0.5	13	24	2.7	2 Moderate	3 Semi-tight	1 Chicken beak	2 Short	2 Green	2 Green	1 While	1 White	2 Yellow	2 Moderate	2 Yellow	125	38.4	27.9	20.7	2.5	5 Moderate
71	3 Purple	1 Green	2 Semi-upthrow	1 Upthrow	3 Strong	3 Strong	3 Strong	137	22	2 Semi-bend	0.4	15	21	2.5	2 Moderate	3 Semi-tight	3 Cylindrical	2 Short	2 Green	2 Green	2 Yellow	3 Orange	2 Yellow	3 Strong	2 Yellow	123	52.7	27.2	18.2	2.5	5 Moderate
72	1 Green	1 Green	2 Semi-upthrow	1 Upthrow	2 Moderate	2 Moderate	2 Moderate	160	32	4 Hook-shaped	0.4	16	30	2.5	2 Moderate	3 Semi-tight	3 Cylindrical	3 Long	2 Green	2 Green	1 While	3 Orange	2 Yellow	3 Strong	2 Yellow	121	81.9	28.1	19.1	2.5	5 Moderate
73	1 Green	1 Green	2 Semi-upthrow	3 Flat	2 Moderate	2 Moderate	2 Moderate	154	28	4 Hook-shaped	0.4	12	27	3	2 Moderate	3 Semi-tight	3 Cylindrical	2 Short	2 Green	2 Green	1 While	1 White	2 Yellow	3 Strong	2 Yellow	120	26.5	32.6	24.8	2.5	7 Weak
74	1 Green	1 Green	2 Semi-upthrow	1 Upthrow	2 Moderate	2 Moderate	2 Moderate	145	29	3 Bend	0.4	12	21	2.9	2 Moderate	1 Sparse	3 Cylindrical	2 Short	2 Green	2 Green	1 While	1 White	2 Yellow	3 Strong	2 Yellow	120	33.1	24.7	18.3	2.5	7 Weak
75	1 Green	1 Green	2 Semi-upthrow	1 Upthrow	2 Moderate	2 Moderate	2 Moderate	160	35	3 Bend	0.4	13	25	3	2 Moderate	3 Semi-tight	3 Cylindrical	2 Short	1 Yellow	1 Yellow	2 Yellow	3 Orange	2 Yellow	3 Strong	2 Yellow	124	16.7	29.6	21.1	2.5	5 Moderate
76	1 Green	1 Green	2 Semi-upthrow	1 Upthrow	2 Moderate	2 Moderate	2 Moderate	155	25	3 Bend	0.4		27	3	2 Moderate	1 Sparse	3 Cylindrical	2 Short	2 Green	2 Green	1 While	3 Orange	2 Yellow	3 Strong	2 Yellow	122	28.4	32.8	18.1	3	5 Moderate
77	1 Green	1 Green	2 Semi-upthrow	4 hang-down	2 Moderate	2 Moderate	2 Moderate	140	30	3 Bend	0.5	13	25	2.1	2 Moderate	3 Semi-tight	3 Cylindrical	3 Long	2 Green	2 Green	2 Yellow	2 Yellow	2 Yellow	3 Strong	2 Yellow	122	41.4	29.9	24.8	2.5	3 Strong
78	1 Green	1 Green	2 Semi-upthrow	4 hang-down	1 Weak	1 Weak	1 Weak	135	27	3 Bend	0.4	11	24	2.1	2 Moderate	1 Sparse	3 Cylindrical	3 Long	2 Green	2 Green	2 Yellow	3 Orange	2 Yellow	3 Strong	2 Yellow	125	42.3	21.1	16.2	3	3 Strong
79	3 Purple	1 Green	3 Flat	1 Upthrow	1 Weak	1 Weak	1 Weak	145	26	2 Semi-bend	0.4	10	24	2.1	2 Moderate	3 Semi-tight	3 Cylindrical	2 Short	2 Green	2 Green	2 Yellow	3 Orange	2 Yellow	3 Strong	2 Yellow	117	22.4	31.8	17.3	3	7 Weak
80	3 Purple	1 Green	2 Semi-upthrow	4 hang-down	3 Strong	3 Strong	3 Strong	155	27	3 Bend	0.55	14	22	3	1 Loose	1 Sparse	2 Fusiform	3 Long	1 Yellow	2 Green	2 Yellow	3 Orange	2 Yellow	3 Strong	2 Yellow	117	52.2	14.7	10.1	2.5	7 Weak
81	1 Green	1 Green	2 Semi-upthrow	4 hang-down	1 Weak	1 Weak	1 Weak	130	18	2 Semi-bend	0.5	12	21	2.7	2 Moderate	1 Sparse	2 Fusiform	2 Short	2 Green	2 Green	2 Yellow	3 Orange	2 Yellow	3 Strong	2 Yellow	117	30.4	23.7	17.9	3	7 Weak
82	3 Purple	1 Green	2 Semi-upthrow	4 hang-down	1 Weak	1 Weak	1 Weak	123	18	2 Semi-bend	0.3	12	20	3.9	1 Loose	1 Sparse	2 Fusiform	2 Short	2 Green	3 Purple	1 While	1 White	2 Yellow	3 Strong	2 Yellow	117	16.2	22.3	16.2	2.5	7 Weak
83	1 Green	1 Green	2 Semi-upthrow	1 Upthrow	2 Moderate	2 Moderate	2 Moderate	134	30	4 Hook-shaped	0.4	11	20	2.3	2 Moderate	1 Sparse	4 Clavate	2 Short	2 Green	2 Green	1 While	1 White	2 Yellow	3 Strong	2 Yellow	117	12.1	26.1	15.1	2.5	7 Weak
84	1 Green	1 Green	2 Semi-upthrow	1 Upthrow	2 Moderate	2 Moderate	2 Moderate	150	23	4 Hook-shaped	0.5	13	25	2.6	1 Loose	1 Sparse	4 Clavate	2 Short	2 Green	3 Purple	2 Yellow	3 Orange	2 Yellow	3 Strong	2 Yellow	117	36.6	31.8	20.7	3	7 Weak
85	1 Green	1 Green	2 Semi-upthrow	2 Semi-upthrow	1 Weak	1 Weak	1 Weak	165	35	4 Hook-shaped	0.4	13	20	3.1	3 Tight	3 Semi-tight	2 Fusiform	2 Short	2 Green	3 Purple	2 Yellow	3 Orange	2 Yellow	3 Strong	2 Yellow	117	80.7	18.2	13.2	2.5	3 Strong
86	3 Purple	1 Green	2 Semi-upthrow	4 hang-down	2 Moderate	2 Moderate	2 Moderate	150	26	4 Hook-shaped	0.5	11	24	3.5	2 Moderate	3 Semi-tight	1 Chicken beak	2 Short	2 Green	3 Purple	2 Yellow	3 Orange	2 Yellow	3 Strong	2 Yellow	118	40.1	30.1	23.9	2.5	3 Strong
87	1 Green	1 Green	2 Semi-upthrow	1 Upthrow	3 Strong	3 Strong	3 Strong	112	25	2 Semi-bend	0.5	14	20	4.2	3 Tight	1 Sparse	4 Clavate	2 Short	2 Green	3 Purple	1 While	1 White	2 Yellow	3 Strong	2 Yellow	122	94.8	23.9	15.2	2	5 Moderate
88	3 Purple	1 Green	2 Semi-upthrow	2 Semi-upthrow	3 Strong	3 Strong	3 Strong	147	17	3 Bend	0.4	10	26	3.1	2 Moderate	3 Semi-tight	4 Clavate	1 Very short	2 Green	3 Purple	1 While	1 White	2 Yellow	2 Moderate	2 Yellow	129	55.9	25.8	17.9	2.5	5 Moderate
89	1 Green	1 Green	2 Semi-upthrow	1 Upthrow	3 Strong	3 Strong	3 Strong	141	26	3 Bend	0.4	13	26	3.1	2 Moderate	1 Sparse	3 Cylindrical	2 Short	2 Green	2 Green	1 While	1 White	2 Yellow	3 Strong	2 Yellow	126	73.8	24.9	14.1	2	5 Moderate
90	1 Green	1 Green	2 Semi-upthrow	1 Upthrow	3 Strong	3 Strong	3 Strong	162	30	3 Bend	0.6	12	23	2.5	2 Moderate	3 Semi-tight	2 Fusiform	2 Short	2 Green	3 Purple	2 Yellow	3 Orange	2 Yellow	3 Strong	2 Yellow	122	27.1	25.1	13.2	3	5 Moderate
91	1 Green	1 Green	2 Semi-upthrow	2 Semi-upthrow	2 Moderate	2 Moderate	2 Moderate	135	25	4 Hook-shaped	0.4	15	16	3.9	2 Moderate	3 Semi-tight	1 Chicken beak	2 Short	2 Green	2 Green	1 While	1 White	2 Yellow	3 Strong	2 Yellow	122	26.8	17.3	10.2	2.5	9 Very weak
92	1 Green	1 Green	2 Semi-upthrow	2 Semi-upthrow	2 Moderate	2 Moderate	2 Moderate	130	30	3 Bend	0.6	13	18	2.5	2 Moderate	3 Semi-tight	2 Fusiform	2 Short	2 Green	3 Purple	1 While	1 White	2 Yellow	3 Strong	2 Yellow	122	26.2	25.8	17.8	2.5	7 Weak
93	1 Green	1 Green	2 Semi-upthrow	1 Upthrow	2 Moderate	2 Moderate	2 Moderate	120	27	4 Hook-shaped	0.6	13	26	2.5	2 Moderate	3 Semi-tight	4 Clavate	2 Short	2 Green	2 Green	2 Yellow	3 Orange	2 Yellow	3 Strong	2 Yellow	124	34.7	23.2	14.9	3	7 Weak
94	1 Green	1 Green	3 Flat	4 hang-down	1 Weak	1 Weak	1 Weak	104	26	2 Semi-bend	0.6	14	20	2.8	2 Moderate	3 Semi-tight	2 Fusiform	2 Short	2 Green	3 Purple	2 Yellow	2 Yellow	2 Yellow	3 Strong	2 Yellow	128	47.6	25.9	9.6	2.5	9 Very weak
95	3 Purple	2 Yellow	3 Flat	1 Upthrow	1 Weak	1 Weak	1 Weak	136	25	4 Hook-shaped	0.4	15	21	2.5	3 Tight	3 Semi-tight	4 Clavate	2 Short	2 Green	3 Purple	2 Yellow	3 Orange	2 Yellow	3 Strong	2 Yellow	120	44.9	18.3	12.1	2.5	7 Weak
96	1 Green	1 Green	2 Semi-upthrow	4 hang-down	3 Strong	3 Strong	1 Weak	120	26	3 Bend	0.4	14	24	3.5	2 Moderate	1 Sparse	1 Chicken beak	2 Short	2 Green	3 Purple	2 Yellow	3 Orange	2 Yellow	3 Strong	2 Yellow	130	60.9	27.2	16.3	2.5	3 Strong
97	1 Green	1 Green	2 Semi-upthrow	1 Upthrow	2 Moderate	2 Moderate	2 Moderate	147	32	3 Bend	1	11	29	3.5	2 Moderate	3 Semi-tight	2 Fusiform	3 Long	3 Purple	2 Green	2 Yellow	3 Orange	2 Yellow	3 Strong	2 Yellow	123	44.4	33.9	20.1	2.5	3 Strong
98	1 Green	1 Green	2 Semi-upthrow	1 Upthrow	2 Moderate	2 Moderate	2 Moderate	141	20	3 Bend	0.8	13	31	2.8	2 Moderate	1 Sparse	2 Fusiform	2 Short	3 Purple	2 Green	2 Yellow	3 Orange	2 Yellow	3 Strong	2 Yellow	123	37.2	27.6	18.2	2.5	3 Strong
99	1 Green	1 Green	2 Semi-upthrow	2 Semi-upthrow	2 Moderate	2 Moderate	2 Moderate	146	41	3 Bend	1	13	36	2.1	3 Tight	3 Semi-tight	3 Cylindrical	2 Short	2 Green	2 Green	2 Yellow	3 Orange	2 Yellow	3 Strong	2 Yellow	131	46.7	30.1	18.6	2.5	3 Strong
100	1 Green	1 Green	3 Flat	1 Upthrow	2 Moderate	2 Moderate	2 Moderate	92	24	2 Semi-bend	0.9	10	20	2.4	2 Moderate	3 Semi-tight	4 Clavate	1 Very short	1 Yellow	2 Green	2 Yellow	3 Orange	2 Yellow	3 Strong	2 Yellow	128	27.2	18.7	13.5	3	3 Strong
101	1 Green	1 Green	3 Flat	3 Flat	3 Strong	3 Strong	3 Strong	96	25	2 Semi-bend	1	13	18	3.5	2 Moderate	3 Semi-tight	4 Clavate	2 Short	2 Green	2 Green	2 Yellow	2 Yellow	2 Yellow	4 Very Strong	4 livid	122	36.1	18.1	13.1	3	3 Strong
102	1 Green	1 Green	2 Semi-upthrow	1 Upthrow	3 Strong	3 Strong	3 Strong	101	30	2 Semi-bend	0.8	12	21	3.1	2 Moderate	3 Semi-tight	3 Cylindrical	2 Short	2 Green	2 Green	2 Yellow	2 Yellow	2 Yellow	3 Strong	2 Yellow	122	25.3	24.2	15.8	2.5	5 Moderate
103	1 Green	1 Green	2 Semi-upthrow	3 Flat	2 Moderate	2 Moderate	2 Moderate	90	26	2 Semi-bend	0.7	9	23	2.6	2 Moderate	3 Semi-tight	4 Clavate	1 Very short	2 Green	2 Green	2 Yellow	3 Orange	2 Yellow	3 Strong	2 Yellow	119	21.8	21.5	14.3	2	5 Moderate
104	1 Green	1 Green	2 Semi-upthrow	4 hang-down	3 Strong	3 Strong	3 Strong	110	15	2 Semi-bend	0.9	13	22	3.5	2 Moderate	3 Semi-tight	4 Clavate	2 Short	2 Green	2 Green	1 While	1 White	2 Yellow	3 Strong	2 Yellow	120	44.2	26.1	16.1	2	5 Moderate
105	1 Green	2 Yellow	2 Semi-upthrow	1 Upthrow	3 Strong	3 Strong	3 Strong	167	35	2 Semi-bend	0.7	15	22	3.8	2 Moderate	3 Semi-tight	2 Fusiform	3 Long	1 Yellow	2 Green	2 Yellow	3 Orange	2 Yellow	3 Strong	2 Yellow	129	60.8	30.6	18.9	3	3 Strong

## Sheet: Quantitative Trait
No.	Stem number per plant SNP	Main Stem Length MSL cm	Peduncle length PL cm	Main stem diameter MSD mm	Main stem nod number MSN	Main ear length MEL mm	Main ear diameter MED mm	Growing period GP d	Grass weight per plant GWP g	Ear weight per plant EWP g	Seed weight per plant SWP g	1000-seed weight TSW g
1	2	135	26	0.4	14	24	2.2	120	86.3	21.2	17.2	2.2
2	1	150	28	0.6	15	23	2.6	115	34.6	20.1	15.1	2.9
3	1	118	25	0.5	13	22	2.3	115	52.3	18.2	14.6	2.8
4	1	143	26	0.5	14	21	2.4	115	56.2	17.9	14.2	2.4
5	1	115	23	0.5	13	20	2.4	120	55.3	14.9	10.9	2.5
6	1	158	29	0.7	14	23	2.6	114	32.4	15.1	11.5	2.5
7	1	146	27	0.5	14	20	2.4	115	61.9	16.8	12.1	2.5
8	1	148	29	0.6	15	20	2.5	109	80.6	16.9	12.1	2.6
9	1	135	25	0.4	13	24	2.4	115	72.6	23.6	17.2	2.9
10	1	100	20	0.4	12	19	2.4	101	35.7	13.7	10.7	2.9
11	1	135	25	0.5	14	23	2.3	110	33.6	18.2	10.9	2.7
12	1	135	25	0.5	14	19	2.2	101	19.5	27.6	21.4	2.9
13	1	135	25	0.5	14	20	2.4	101	37.2	29.3	15.2	2.9
14	1	115	23	0.5	13	19	2.4	101	83.6	26.8	21.4	2.7
15	1	108	22	0.5	13	17	2.5	101	45.8	11.5	9.7	2.7
16	1	149	26	0.5	14	26	2.6	130	30.4	18.2	14.5	3.6
17	1	135	26	0.4	14	23	2.5	123	65.8	14.9	10.8	3.9
18	1	90	26	0.4	13	17	2.3	101	19.8	15.3	11.2	3.2
19	1	148	28	0.4	15	23	2.5	130	30.8	16.9	12.3	2.9
20	1	151	29	0.5	15	20	2.3	130	51.4	16.1	11.2	2.8
21	1	147	26	0.4	14	20	2.3	123	39.2	15.9	10.3	2.4
22	1	153	26	0.7	13	20	3.1	120	41.5	18.1	13.9	2.6
23	1	148	26	0.5	15	20	2.5	120	56.2	16.9	12.4	2.7
24	1	146	25	0.4	15	22	2.4	115	55.3	13.9	11.2	3.1
25	1	125	25	0.5	14	19	2.4	123	32.5	18.6	13.1	2.9
26	3	114	18	1	11	37	2.9	124	20.9	20.3	12.3	3
27	2	135	26	0.5	14	18	2.4	121	70.6	22.8	17.9	2.7
28	1	115	25	0.5	14	18	2.5	101	71.6	18.8	13.9	2.2
29	1	124	25	0.5	14	19	2.5	101	35.7	15.9	10.2	2.7
30	1	112	24	0.4	14	17	2.4	101	33.9	15.9	12.1	2.6
31	2	120	25	0.8	14	18	2.4	101	19.5	16.1	12.8	2.6
32	1	150	26	0.7	14	24	2.5	120	38.2	15.9	11.3	2.6
33	1	121	25	0.5	12	23	2.4	120	83.6	13.9	11.1	2.5
34	1	145	24	0.6	14	20	2.4	123	53.6	18.9	13.9	2.8
35	1	155	26	0.7	15	24	2.6	120	35.4	16.9	11.1	2.6
36	1	115	31	0.5	14	23	3.3	117	34.6	23.8	18.2	3
37	1	107	21	0.6	14	21	2.5	101	52.1	11.7	9.3	2.9
38	1	130	26	0.4	13	21	1.9	120	59.2	18.1	10.1	3
39	2	135	22	0.6	14	25	2.9	120	75.3	29.6	23.4	3
40	3	120	26	0.7	16	25	2.5	121	32.8	29.1	15.1	2.5
41	3	136	40	0.6	13	28	2.4	123	85.9	26.2	21.2	2.5
42	2	150	30	0.5	13	24	2.4	118	81.6	23.8	18.3	3
43	3	134	32	0.4	12	20	2.5	122	75.6	18.1	14.2	3
44	1	145	24	0.6	11	28	3.2	119	34.7	41.1	27.3	2.5
45	2	127	18	0.5	15	23	2.8	122	33.4	23.2	18.1	2
46	1	110	27	0.4	11	25	2.5	113	9.2	18.6	21.4	2
47	2	156	26	0.5	14	40	2.2	119	71.3	25.6	16.3	2.5
48	1	136	23	0.4	13	25	2.4	125	74.6	22.1	15.2	2.5
49	1	130	24	0.4	15	22	2.3	121	119.8	14.3	9.5	3
50	3	132	24	0.4	13	25	2.4	122	37.2	25.9	21.1	2.5
51	2	130	20	0.4	15	19	1.9	122	83.8	21.2	15.2	2.5
52	2	123	27	0.4	13	26	2.8	118	93.1	23.8	18.1	3
53	3	160	31	0.4	10	25	3.2	121	30.4	22.8	11.5	2.5
54	2	130	27	0.4	12	24	1.9	122	85.8	18.2	13.1	2.5
55	2	110	23	0.5	13	21	3.2	123	19.4	31.8	21.8	3
56	2	112	25	0.4	14	24	2.6	123	40.8	22.3	16.2	3
57	2	132	22	0.4	12	22	1.9	122	55.4	25.1	18.1	2
58	3	154	23	0.5	13	24	0.7	123	39.2	25.9	9.5	2.5
59	2	155	25	0.5	13	21	2.2	122	44.5	20.2	15.3	3
60	2	112	24	0.5	13	18	2.1	101	52.1	11.6	9.6	2.9
61	2	153	26	0.5	11	26	2.7	120	45.5	25.9	16.2	2.5
62	1	164	32	0.6	11	32	2.7	120	37.9	33.6	23.8	3
63	2	90	19	0.5	14	25	2.5	119	38.3	20.1	11.2	3
64	3	147	28	0.5	14	22	2.8	123	22.6	28.7	18.9	3
65	2	130	24	0.4	11	23	2	123	46.9	19.1	12.1	2.5
66	3	170	30	0.4	12	21	2.6	123	23.3	27.8	18.1	2
67	3	106	22	0.5	13	20	2.9	120	45.1	25.1	18.8	3.5
68	2	153	25	0.5	12	24	3.5	123	51.9	31.7	17.3	3
69	2	133	23	0.5	11	23	3.5	123	43.9	24.8	18.2	3.5
70	3	133	28	0.5	13	24	2.7	125	38.4	27.9	20.7	2.5
71	3	137	22	0.4	15	21	2.5	123	52.7	27.2	18.2	2.5
72	2	160	32	0.4	16	30	2.5	121	81.9	28.1	19.1	2.5
73	2	154	28	0.4	12	27	3	120	26.5	32.6	24.8	2.5
74	2	145	29	0.4	12	21	2.9	120	33.1	24.7	18.3	2.5
75	2	160	35	0.4	13	25	3	124	16.7	29.6	21.1	2.5
76	2	155	25	0.4	12	27	3	122	28.4	32.8	18.1	3
77	2	140	30	0.5	13	25	2.1	122	41.4	29.9	24.8	2.5
78	1	135	27	0.4	11	24	2.1	125	42.3	21.1	16.2	3
79	1	145	26	0.4	10	24	2.1	117	22.4	31.8	17.3	3
80	3	155	27	0.55	14	22	3	117	52.2	14.7	10.1	2.5
81	1	130	18	0.5	12	21	2.7	117	30.4	23.7	17.9	3
82	1	123	18	0.3	12	20	3.9	117	16.2	22.3	16.2	2.5
83	2	134	30	0.4	11	20	2.3	117	12.1	26.1	15.1	2.5
84	2	150	23	0.5	13	25	2.6	117	36.6	31.8	20.7	3
85	1	165	35	0.4	13	20	3.1	117	80.7	18.2	13.2	2.5
86	2	150	26	0.5	11	24	3.5	118	40.1	30.1	23.9	2.5
87	3	112	25	0.5	14	20	4.2	122	94.8	23.9	15.2	2
88	3	147	17	0.4	10	26	3.1	129	55.9	25.8	17.9	2.5
89	3	141	26	0.4	13	26	3.1	126	73.8	24.9	14.1	2
90	3	162	30	0.6	12	23	2.5	122	27.1	25.1	13.2	3
91	2	135	25	0.4	15	16	3.9	122	26.8	17.3	10.2	2.5
92	2	130	30	0.6	13	18	2.5	122	26.2	25.8	17.8	2.5
93	2	120	27	0.6	13	26	2.5	124	34.7	23.2	14.9	3
94	1	104	26	0.6	14	20	2.8	128	47.6	25.9	9.6	2.5
95	1	136	25	0.4	15	21	2.5	120	44.9	18.3	12.1	2.5
96	3	120	26	0.4	14	24	3.5	130	60.9	27.2	16.3	2.5
97	2	147	32	1	11	29	3.5	123	44.4	33.9	20.1	2.5
98	2	141	20	0.8	13	31	2.8	123	37.2	27.6	18.2	2.5
99	2	146	41	1	13	36	2.1	131	46.7	30.1	18.6	2.5
100	2	92	24	0.9	10	20	2.4	128	27.2	18.7	13.5	3
101	3	96	25	1	13	18	3.5	122	36.1	18.1	13.1	3
102	3	101	30	0.8	12	21	3.1	122	25.3	24.2	15.8	2.5
103	2	90	26	0.7	9	23	2.6	119	21.8	21.5	14.3	2
104	3	110	15	0.9	13	22	3.5	120	44.2	26.1	16.1	2
105	3	167	35	0.7	15	22	3.8	129	60.8	30.6	18.9	3

## Sheet: Qualitative Traits
No.	Leaf sheath color LSC	Leaf color of seedling LCS	Seedling leaf attitude SLA	Blooming leaf attitude BLA	Tiller habit TH	Branch habit BH	Peduncle shape PS	Ear compactness EC	Spike density SD	Ear shape ES	Bristle length BL	Bristle color BC	Protecting glume color PGC	Stigma color STC	Anther color AC	Seed color SC	Shattering habit SH	Kernel color KC	Lodging resistance LR
1	1	1	3	1	2	2	3	3	1	3	4	2	2	2	3	2	3	2	3
2	1	1	3	1	1	1	3	3	1	3	4	2	2	2	3	2	3	2	3
3	1	1	3	1	1	1	3	2	3	2	2	2	2	2	3	2	3	2	3
4	1	2	3	1	1	1	3	3	3	2	2	3	2	2	3	2	2	2	3
5	1	1	3	1	1	1	2	2	1	3	2	2	2	2	3	2	2	2	5
6	1	1	3	1	1	1	3	2	1	2	2	2	2	2	3	2	2	2	5
7	1	1	2	1	2	2	3	3	1	2	2	3	2	2	3	2	2	2	3
8	1	1	2	1	2	2	3	2	1	2	2	2	2	2	3	2	2	2	3
9	1	1	2	1	1	1	3	2	1	2	2	2	2	2	3	2	2	2	3
10	1	1	3	1	1	1	3	3	1	2	3	2	2	2	3	2	2	2	3
11	3	3	3	4	1	1	3	2	1	2	2	2	2	2	1	2	2	2	5
12	3	1	2	1	1	1	4	2	1	2	2	2	2	2	3	2	2	2	3
13	1	1	2	1	1	1	3	2	1	2	2	2	2	2	3	2	2	2	5
14	1	1	2	1	1	1	2	2	1	2	2	2	2	2	3	2	2	2	3
15	1	1	2	1	1	1	3	2	1	2	2	2	2	2	3	2	2	2	3
16	1	1	3	1	1	1	3	2	1	2	3	1	2	2	3	2	2	2	3
17	1	1	3	1	1	1	3	2	1	3	2	2	2	2	3	2	2	2	3
18	1	1	1	1	2	2	3	2	1	3	2	2	2	2	3	2	2	2	5
19	1	1	3	1	2	2	3	2	1	4	2	2	2	2	3	2	2	2	3
20	1	1	3	1	2	2	3	3	1	4	3	2	2	2	3	2	2	2	3
21	3	1	2	1	2	2	3	2	1	3	2	1	2	2	3	4	2	2	5
22	1	2	3	2	1	1	2	2	1	2	3	2	2	2	3	2	2	2	3
23	1	2	3	1	2	2	3	2	1	2	2	3	2	2	3	2	2	2	3
24	1	1	3	1	2	2	3	2	1	2	2	2	2	2	3	2	2	2	3
25	3	1	2	1	2	2	3	2	1	3	2	2	2	2	3	2	2	2	3
26	1	1	2	1	3	3	3	3	3	2	2	3	2	2	3	2	3	2	5
27	1	1	3	1	2	2	2	2	1	3	2	2	2	1	3	2	2	2	3
28	1	1	2	1	2	2	3	2	1	2	3	2	2	2	3	2	2	2	3
29	3	1	3	1	2	2	3	2	1	2	2	2	2	2	3	2	2	2	3
30	1	1	2	2	1	1	3	2	1	2	2	2	2	2	3	2	2	2	3
31	1	1	2	2	3	3	3	2	1	2	2	2	2	2	3	5	2	4	3
32	1	1	3	1	1	1	3	2	1	3	2	2	2	2	3	2	2	2	3
33	1	1	3	1	1	1	3	2	1	3	2	2	2	2	3	2	2	2	3
34	1	1	3	1	1	1	3	2	1	2	2	2	2	2	3	2	2	2	3
35	1	1	3	1	1	1	3	2	1	2	2	2	2	2	3	2	2	2	5
36	3	1	2	1	1	1	3	2	1	2	2	2	2	1	1	2	3	2	3
37	1	1	3	1	1	1	3	2	1	4	2	2	2	2	3	2	3	2	3
38	3	1	2	2	2	1	3	2	1	3	3	2	2	2	3	2	3	2	3
39	1	1	1	4	2	2	2	2	1	3	2	2	2	3	3	2	2	2	5
40	1	2	3	2	3	3	4	2	1	3	2	2	2	2	3	2	3	2	5
41	1	1	2	2	3	3	4	2	1	3	3	2	2	1	3	2	3	2	5
42	3	1	2	1	2	2	3	2	1	2	3	1	2	2	3	2	3	2	5
43	3	1	2	1	3	3	3	2	1	3	1	2	2	2	3	2	3	2	5
44	1	1	2	1	1	1	3	2	1	2	2	2	2	2	3	2	3	2	3
45	1	1	2	1	2	2	2	2	1	2	2	2	2	2	3	2	3	2	3
46	3	2	2	2	1	1	3	2	1	2	1	2	2	3	3	2	3	2	5
47	1	1	2	1	2	2	3	2	1	2	3	3	2	1	3	2	3	2	3
48	1	1	2	1	1	1	3	2	1	3	2	2	2	2	2	2	3	2	5
49	1	1	2	1	1	1	4	2	1	2	3	1	2	2	3	2	3	2	3
50	1	1	2	1	1	3	3	3	1	3	2	2	2	1	1	2	2	2	3
51	1	1	2	1	2	2	2	2	1	3	2	2	2	1	3	2	2	2	3
52	1	1	2	1	2	2	3	2	1	3	2	2	2	2	3	2	3	2	5
53	3	1	2	1	3	3	2	2	1	3	2	2	2	1	1	2	3	2	5
54	1	1	3	1	2	2	3	2	1	3	3	2	2	2	3	2	2	2	5
55	1	1	1	1	2	2	2	2	1	3	2	2	2	2	3	2	2	2	5
56	1	1	2	1	2	2	4	2	1	3	2	3	2	2	2	2	3	2	5
57	1	1	3	4	2	2	3	2	1	3	2	2	2	2	3	2	3	2	5
58	3	1	2	1	3	3	3	2	1	3	2	2	2	2	2	2	3	2	5
59	1	2	3	4	2	2	3	3	1	3	3	2	2	2	3	2	3	2	5
60	1	1	2	1	2	2	3	2	1	2	2	2	2	2	3	2	2	2	5
61	3	1	2	4	2	2	4	2	1	2	2	2	2	2	3	2	3	2	5
62	3	1	2	4	1	1	4	2	1	2	3	2	2	1	2	2	3	2	5
63	1	1	2	1	2	2	3	2	1	3	2	2	2	1	3	2	3	2	5
64	1	1	3	3	3	3	4	2	1	2	2	2	2	1	1	2	3	2	5
65	1	1	1	4	2	2	2	2	1	2	2	2	2	2	3	2	3	2	5
66	1	1	3	4	3	3	3	2	1	2	2	2	2	3	3	2	3	2	5
67	1	1	3	4	3	3	2	2	1	4	2	2	2	2	3	2	3	2	3
68	3	1	2	1	1	2	3	2	1	3	2	2	2	2	3	2	3	2	3
69	3	1	2	3	1	2	3	2	3	2	2	2	2	2	3	2	3	2	3
70	1	1	2	1	3	3	4	2	3	1	2	2	2	1	1	2	2	2	5
71	3	1	2	1	3	3	2	2	3	3	2	2	2	2	3	2	3	2	5
72	1	1	3	1	2	2	4	2	3	3	3	2	2	1	3	2	3	2	5
73	1	1	2	3	2	2	4	2	3	3	2	2	2	1	1	2	3	2	7
74	1	1	2	1	2	2	3	2	1	3	2	2	2	1	1	2	3	2	7
75	1	1	2	1	2	2	3	2	3	3	2	1	1	2	3	2	3	2	5
76	1	1	2	1	2	2	3	2	1	3	2	2	2	1	3	2	3	2	5
77	1	1	2	4	2	2	3	2	3	3	3	2	2	2	2	2	3	2	3
78	1	1	2	4	1	1	3	2	1	3	3	2	2	2	3	2	3	2	3
79	3	1	3	1	1	1	2	2	3	3	2	2	2	2	3	2	3	2	7
80	3	1	2	4	3	3	3	1	1	2	3	1	2	2	3	2	3	2	7
81	1	1	2	4	1	1	2	2	1	2	2	2	2	2	3	2	3	2	7
82	3	1	2	4	1	1	2	1	1	2	2	2	3	1	1	2	3	2	7
83	1	1	2	1	2	2	4	2	1	4	2	2	2	1	1	2	3	2	7
84	1	1	2	1	2	2	4	1	1	4	2	2	3	2	3	2	3	2	7
85	1	1	2	2	1	1	4	3	3	2	2	2	3	2	3	2	3	2	3
86	3	1	2	4	2	2	4	2	3	1	2	2	3	2	3	2	3	2	3
87	1	1	2	1	3	3	2	3	1	4	2	2	3	1	1	2	3	2	5
88	3	1	2	2	3	3	3	2	3	4	1	2	3	1	1	2	2	2	5
89	1	1	2	1	3	3	3	2	1	3	2	2	2	1	1	2	3	2	5
90	1	1	2	1	3	3	3	2	3	2	2	2	3	2	3	2	3	2	5
91	1	1	2	2	2	2	4	2	3	1	2	2	2	1	1	2	3	2	9
92	1	1	2	2	2	2	3	2	3	2	2	2	3	1	1	2	3	2	7
93	1	1	2	1	2	2	4	2	3	4	2	2	2	2	3	2	3	2	7
94	1	1	3	4	1	1	2	2	3	2	2	2	3	2	2	2	3	2	9
95	3	2	3	1	1	1	4	3	3	4	2	2	3	2	3	2	3	2	7
96	1	1	2	4	3	1	3	2	1	1	2	2	3	2	3	2	3	2	3
97	1	1	2	1	2	2	3	2	3	2	3	3	2	2	3	2	3	2	3
98	1	1	2	1	2	2	3	2	1	2	2	3	2	2	3	2	3	2	3
99	1	1	2	2	2	2	3	3	3	3	2	2	2	2	3	2	3	2	3
100	1	1	3	1	2	2	2	2	3	4	1	1	2	2	3	2	3	2	3
101	1	1	3	3	3	3	2	2	3	4	2	2	2	2	2	2	4	4	3
102	1	1	2	1	3	3	2	2	3	3	2	2	2	2	2	2	3	2	5
103	1	1	2	3	2	2	2	2	3	4	1	2	2	2	3	2	3	2	5
104	1	1	2	4	3	3	2	2	3	4	2	2	2	1	1	2	3	2	5
105	1	2	2	1	3	3	2	2	3	2	3	1	2	2	3	2	3	2	3
